# Supplementary material for: Interpenetrating porous photonic crystal balls for rapid naked eye detection of uranyl ions
Source: Royal Society of Chemistry journal article supplement (doi:10.1039/d2an00839d), 2022-01-01
Supplement: d2an00839d1.pdf [file d2an00839d1.pdf]

## Supplementary Information

# Interpenetrating Porous Photonic Crystal Balls for Rapid Naked Eye Detection of Uranyl Ions

Bing Liu, Letian Li, Wenzhao Liu, Qianshan Chen, Zhaoyang Wu\*

State Key Laboratory of Chemo/Bio-sensing and Chemo-metrics, College of Chemistry and Chemical Engineering,  
Hunan University, Changsha 410082, People's Republic of China

\* Corresponding author. E-mail: [zywu@hnu.edu.cn](mailto:zywu@hnu.edu.cn)

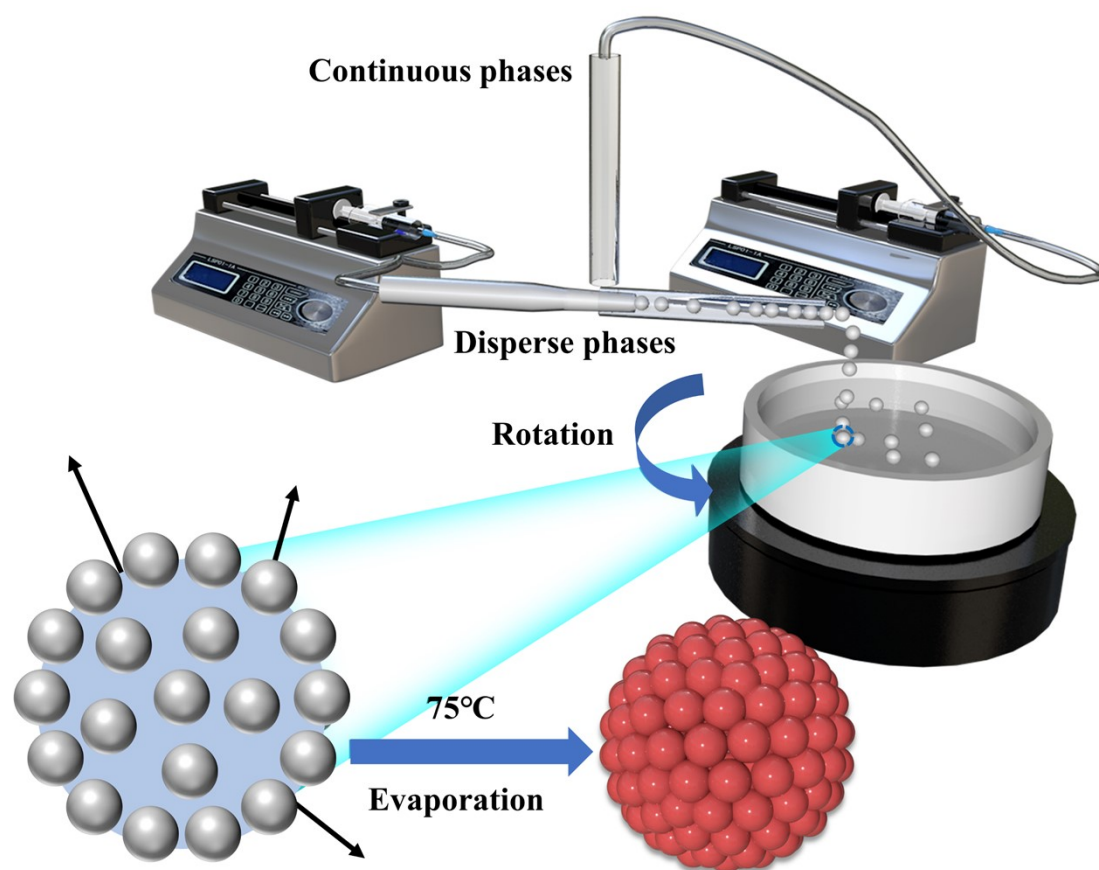

**Figure S1.** Schematic diagram of the preparation of photonic crystal balls templates via T-shaped microfluidic device.

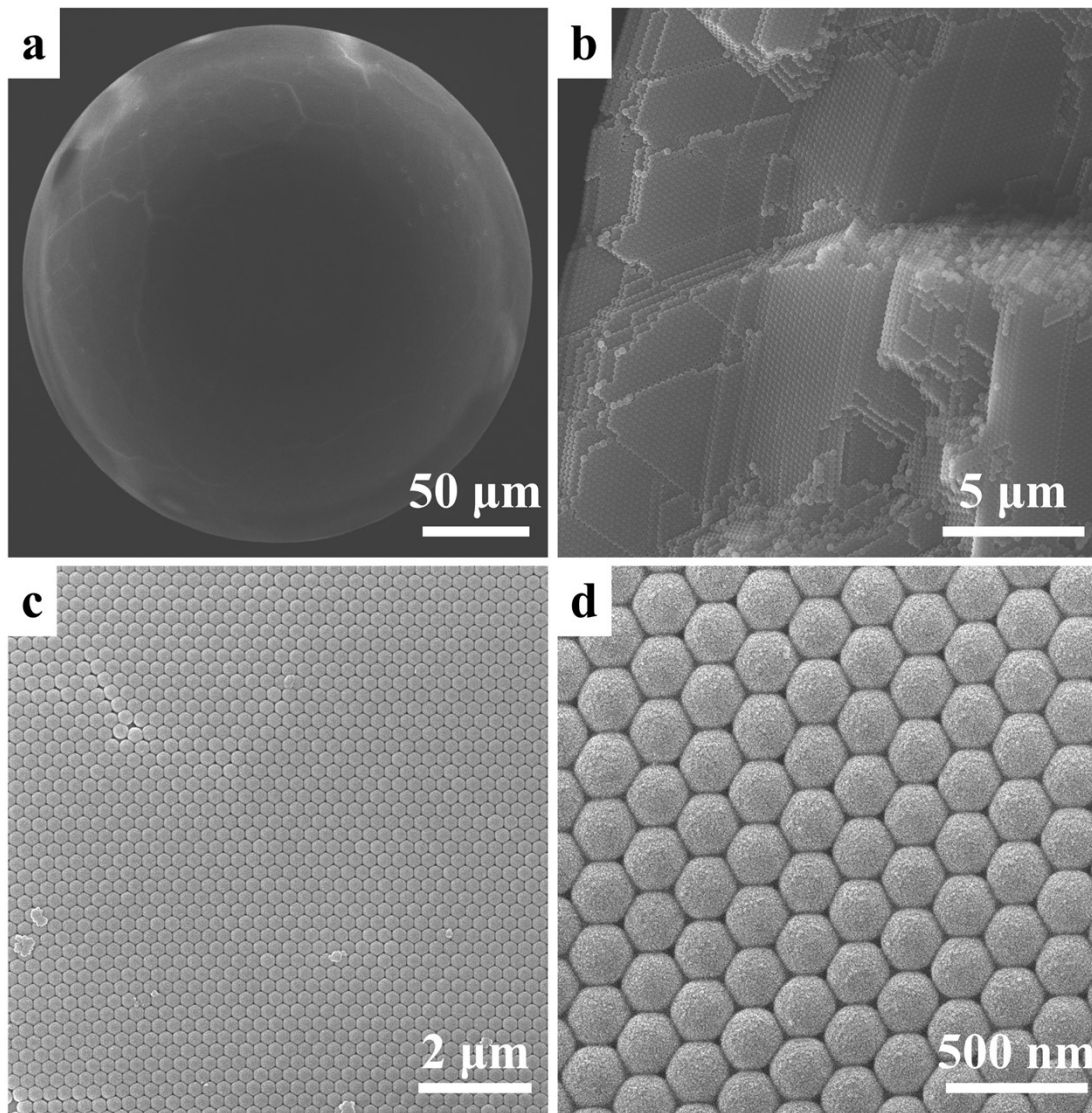

**Figure S2.** SEM images of photonic crystal balls template at different magnifications.

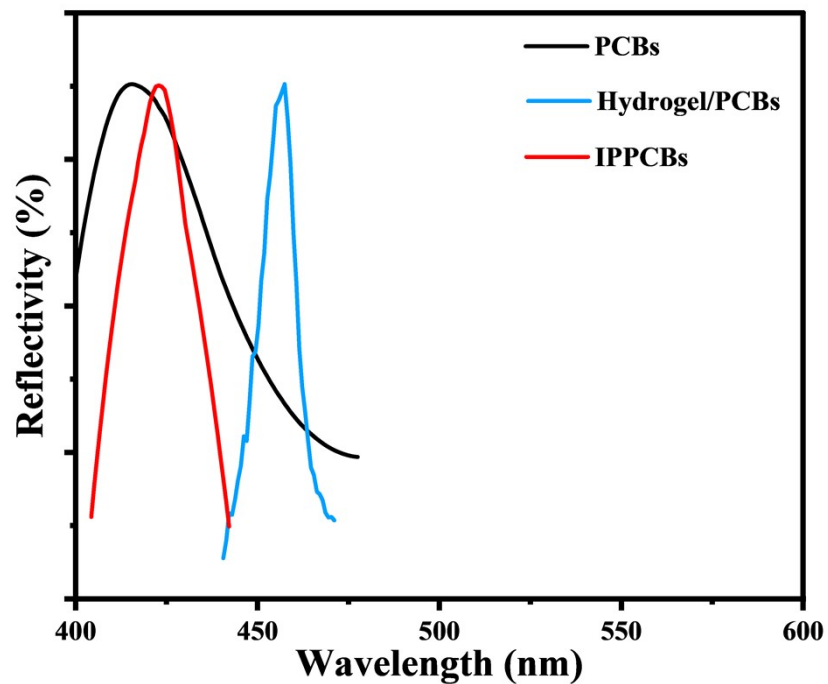

**Figure S3.** The corresponding reflectance spectrum of PCBs, hydrogel/PCBs and IPPCBs.

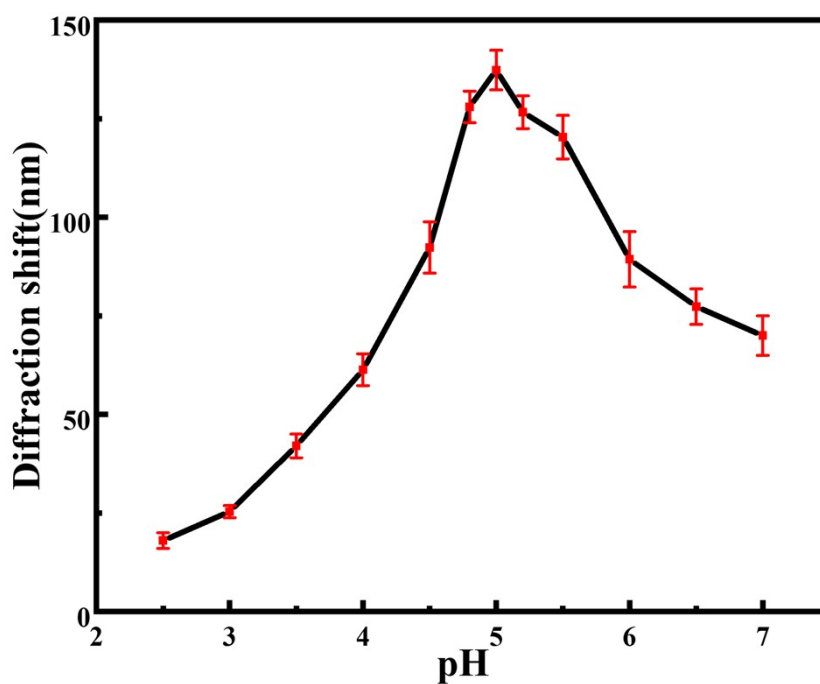

**Figure S4.** The effect of pH on the performance of IPPCBs in response to  $\text{UO}_2^{2+}$ . (The concentration of  $\text{UO}_2^{2+}$  used in the experiment is  $0.1 \mu\text{M}$ )

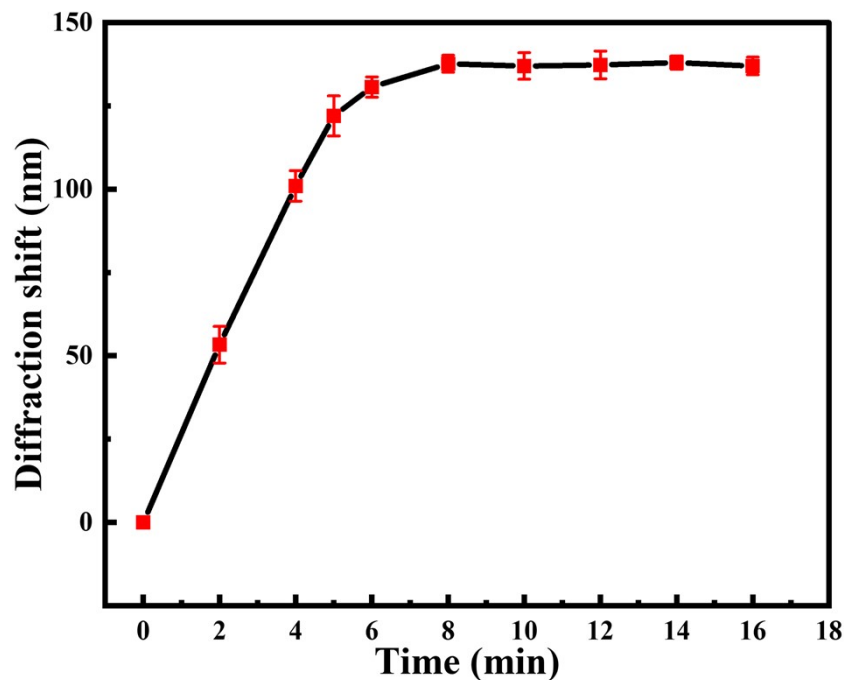

**Figure S5.** Optimization of reaction time of IPPCBs in response to  $\text{UO}_2^{2+}$ . (The concentration of  $\text{UO}_2^{2+}$  used in the experiment is  $0.1 \mu\text{M}$ )

**Table S1.** Comparison of different photonic crystal sensors for uranyl ion analysis.

| Responsive group      | Angle dependency | Sensor size      | Linear range              | Responding speed | Refs      |
|-----------------------|------------------|------------------|---------------------------|------------------|-----------|
| Carboxy and amidoxime | None             | Micron scale     | 1nM-<br>0.1 $\mu\text{M}$ | 12 min           | This work |
| Carboxy               | Yes              | Centimeter scale | Not given                 | 1 h              | Ref.1     |
| Carboxy and amidoxime | Yes              | Centimeter scale | Not given                 | 1 h              | Ref.2     |
| Amidoxime             | Yes              | Centimeter scale | 1nM-<br>100 $\mu\text{M}$ | 40 min           | Ref.3     |

## References

- [1] F. Xiao, Y. Sun, W. Du, W. Shi, Y. Wu, S. Liao, Z. Wu, R. Yu, Smart Photonic Crystal Hydrogel Material for Uranyl Ion Monitoring and Removal in Water, *Advanced Functional Materials* 27(42) (2017) 1702147.
- [2] F. Xiao, H. Li, P. Xie, J. Liu, W. Du, L. Li, S. Yang, Z. Wu, Colloidal templating of highly ordered porous amidoxime-functionalized hydrogel for intelligent treatment of uranium contaminated water, *Chemical Engineering Journal* 431 (2022) 134141.
- [3] Q. Chen, C. Wang, S. Wang, J. Zhou, Z. Wu, A responsive photonic crystal film sensor for the ultrasensitive detection of uranyl ions, *Analyst* 145(16) (2020) 5624-5630.
